# Supplementary material for: Spectroscopic demonstration of sinapic acid methyl ester complexes with serum albumins
Source: Royal Society of Chemistry journal article supplement (doi:10.1039/c9ra09980h), 2020-01-01
Supplement: c9ra09980h1.pdf [file c9ra09980h1.pdf]

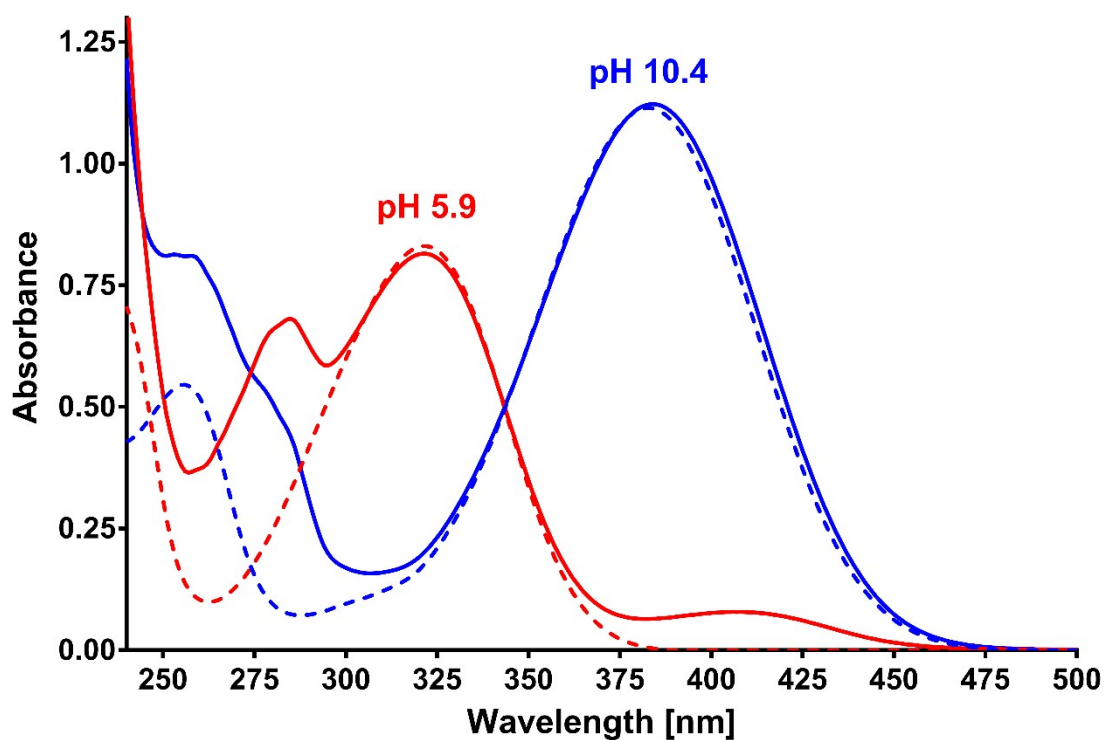

**Figure A.1.** Calculated absorption spectra of dissociated and undissociated MESA with and without SSA.

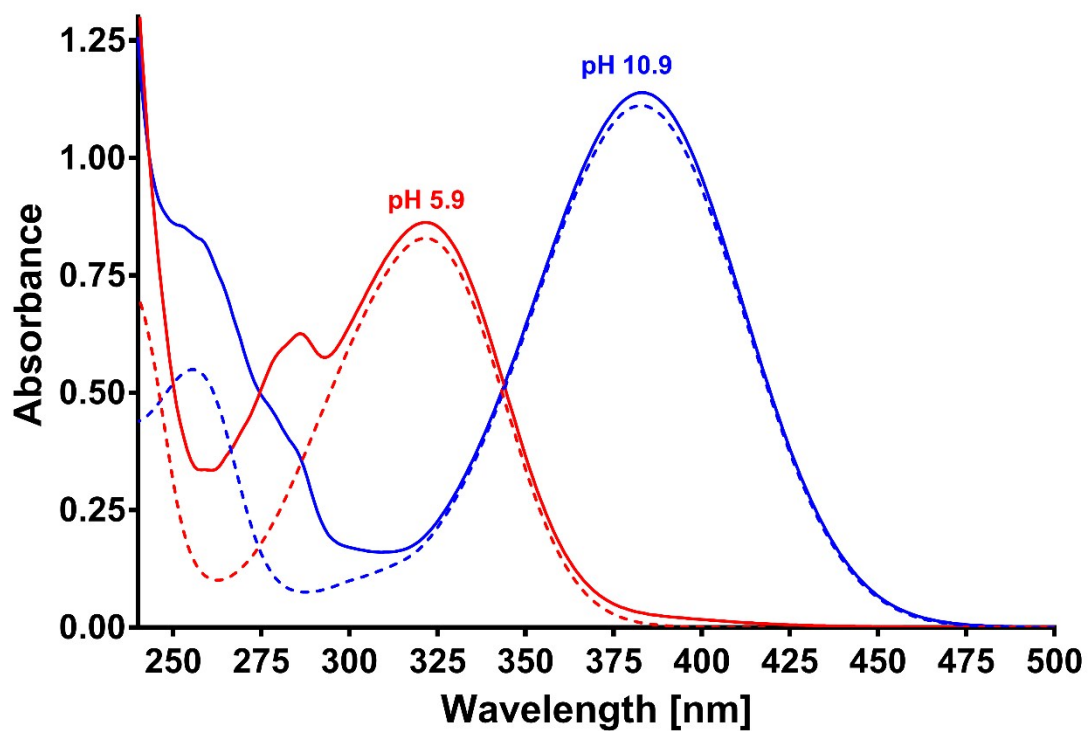

**Figure A.2.** Absorption spectra of MESA with (dashed line) and without HSA (solid line) versus pH. Concentration of MESA 15  $\mu\text{M}$ , concentration of HSA 10  $\mu\text{M}$ , 1cm path length. Red line - pH = 5.9, blue line - pH = 10.9.

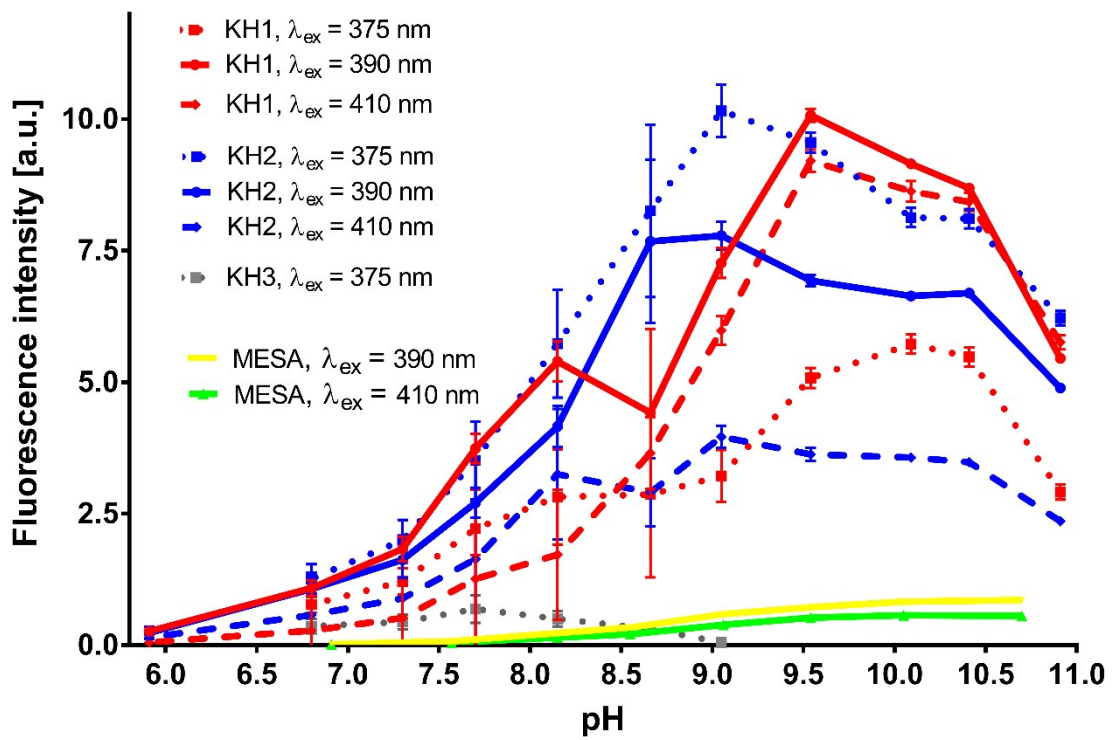

**Figure A.3.** Changes of complexes intensities from decomposed fluorescence spectra of MESA with HSA versus pH.

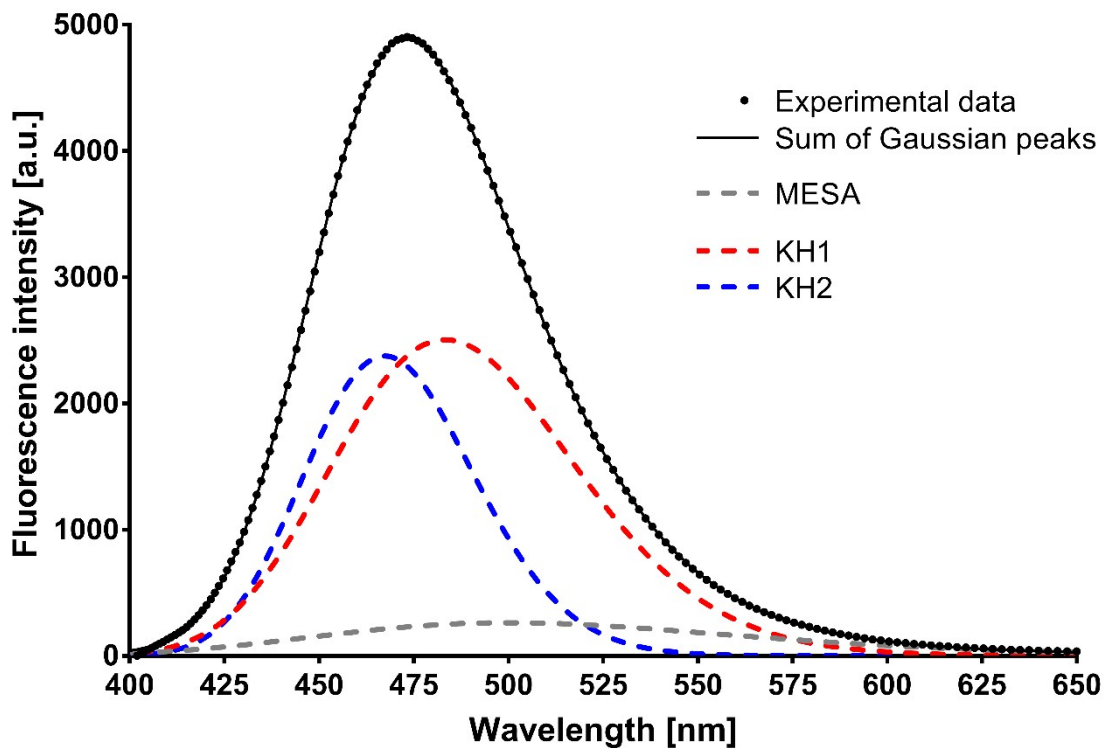

**Figure A.4.** Decomposed fluorescence spectra of MESA with HSA at pH = 9.56.

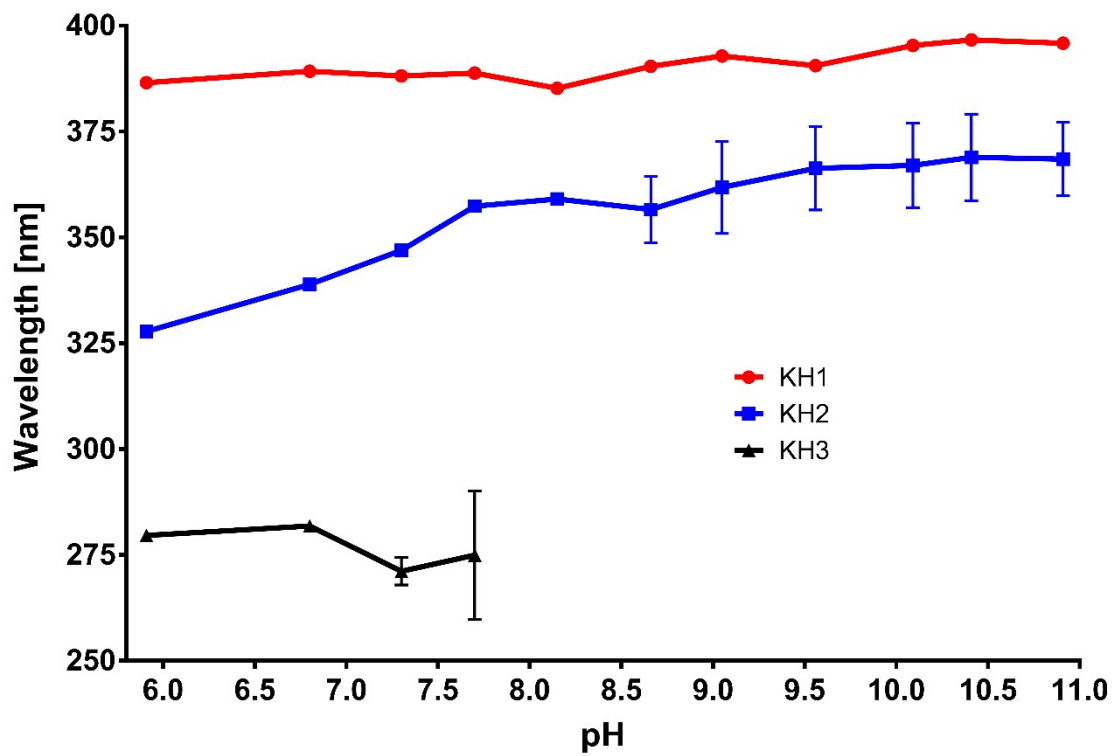

**Figure A.5.** Absorption maxima of complexes from decomposed excitation fluorescence spectra of MESA with HSA versus pH.

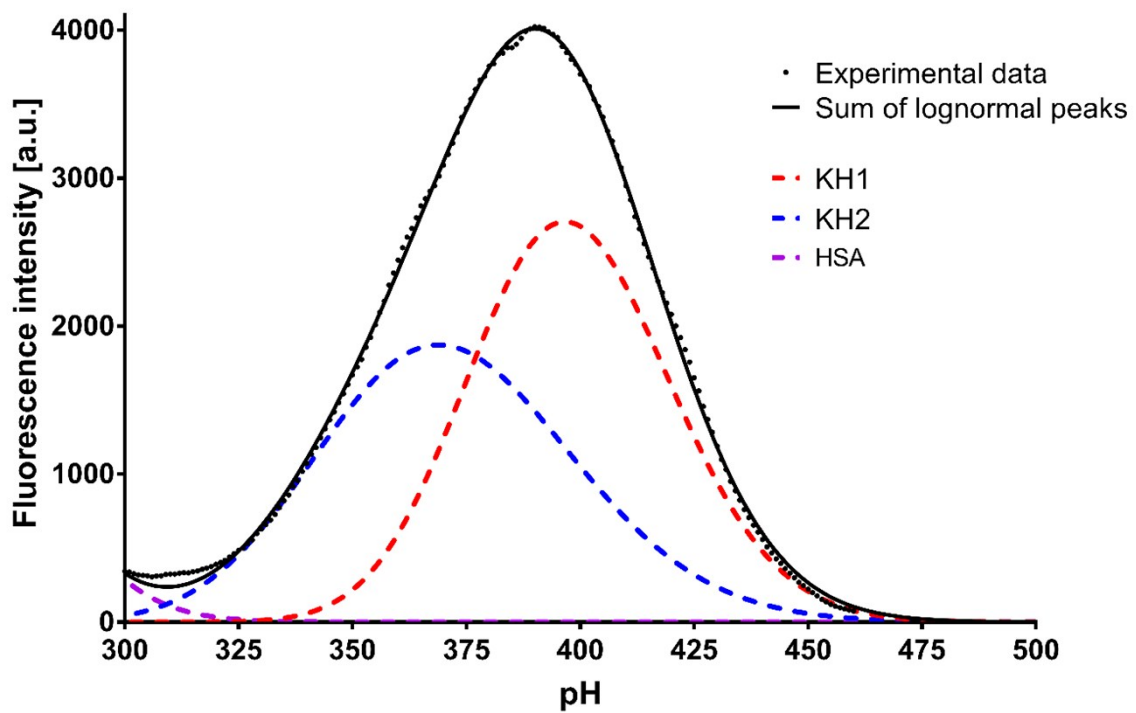

**Figure A.6.** Decomposed fluorescence excitation spectra of MESA with HSA at pH = 9.56.

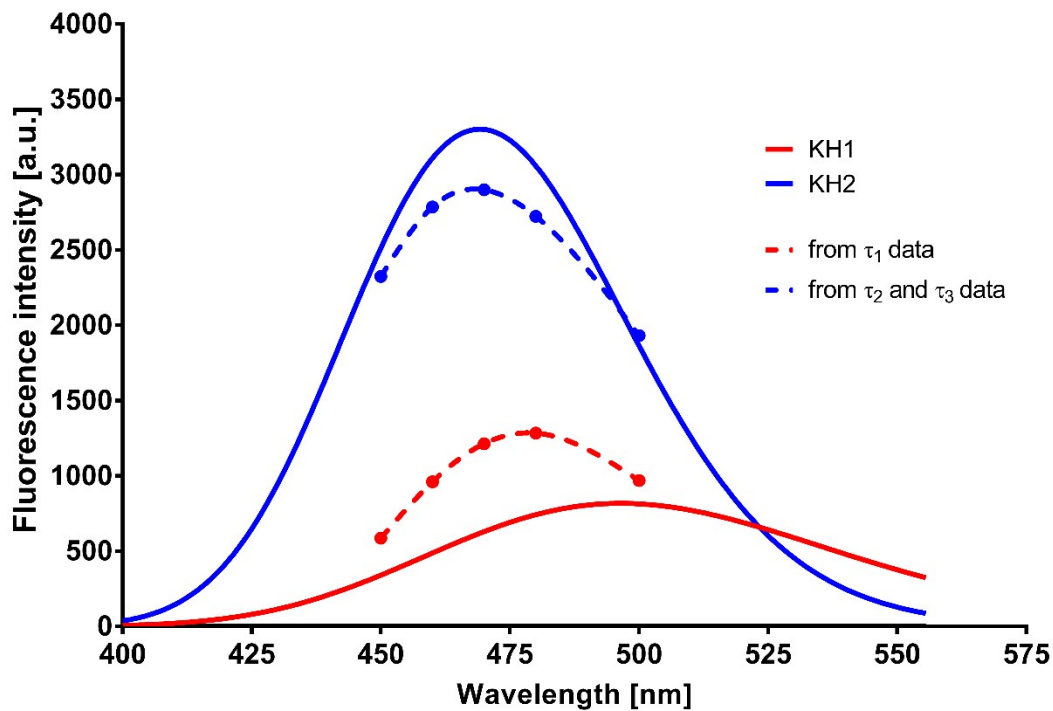

**Figure A.7.** Normalized fluorescence spectra of complexes obtained from lifetime measurements at pH = 9.05. Calculated fluorescence intensities have been obtained by multiplying emission spectra by respective “f” factors from decay reconvolutions.

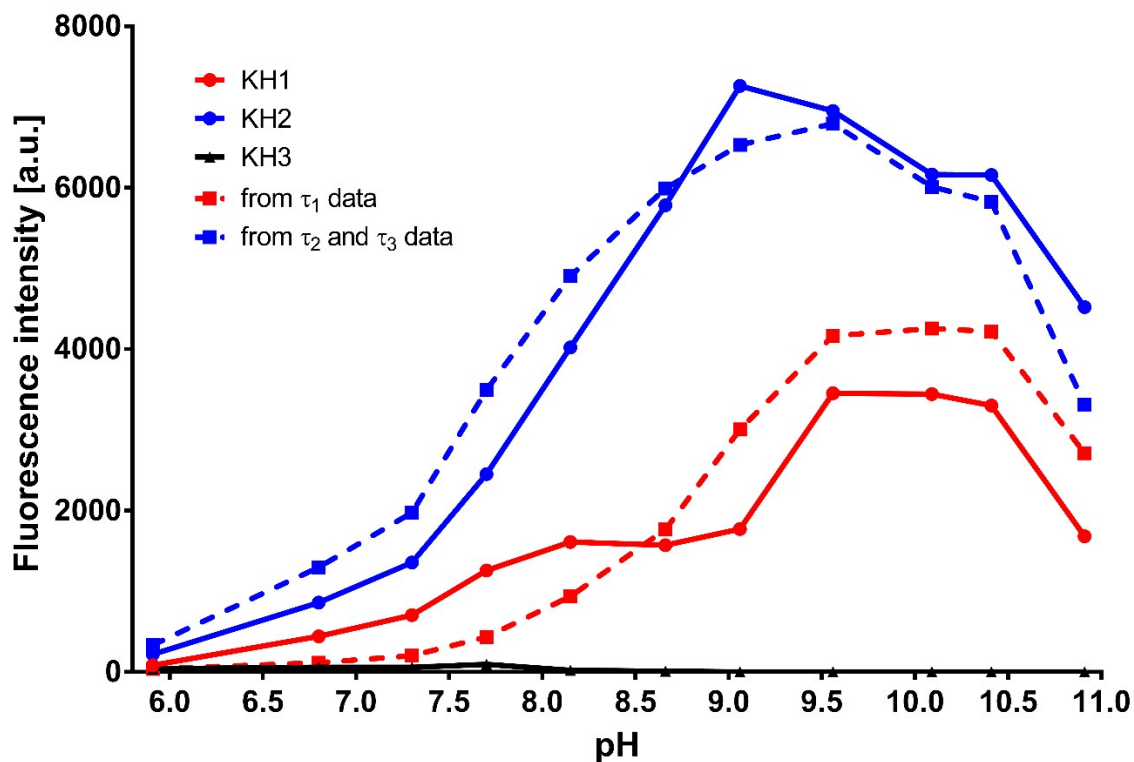

**Figure A.8.** Comparison between fluorescence intensity of complexes from decomposed fluorescence spectra and fluorescence intensity of complexes obtained from lifetime measurements for  $\lambda_{em} = 480$  nm versus pH. Calculated fluorescence intensities have been obtained by multiplying emission spectra by respective “f” factors from decay reconvolutions

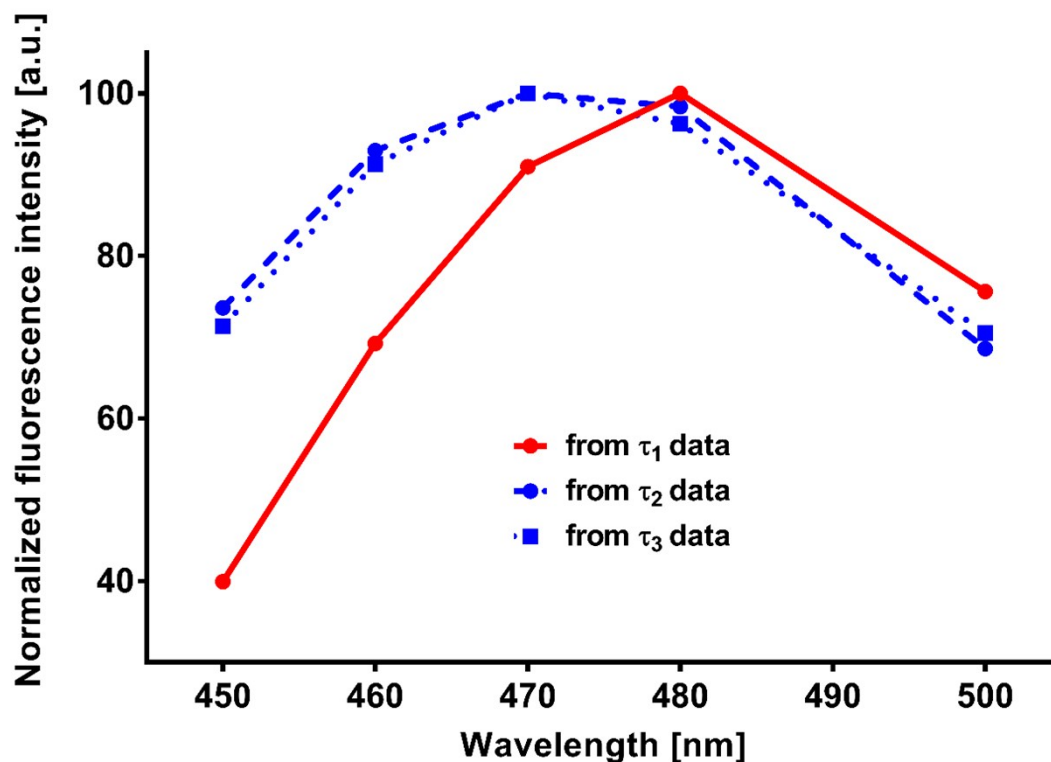

**Figure A.9.** Decomposed fluorescence spectra of MESA with HSA and fluorescence spectra of complexes obtained from lifetime measurements at pH = 9.05. Calculated fluorescence intensities have been obtained by multiplying emission spectra by respective “f” factors from decay reconvolutions.

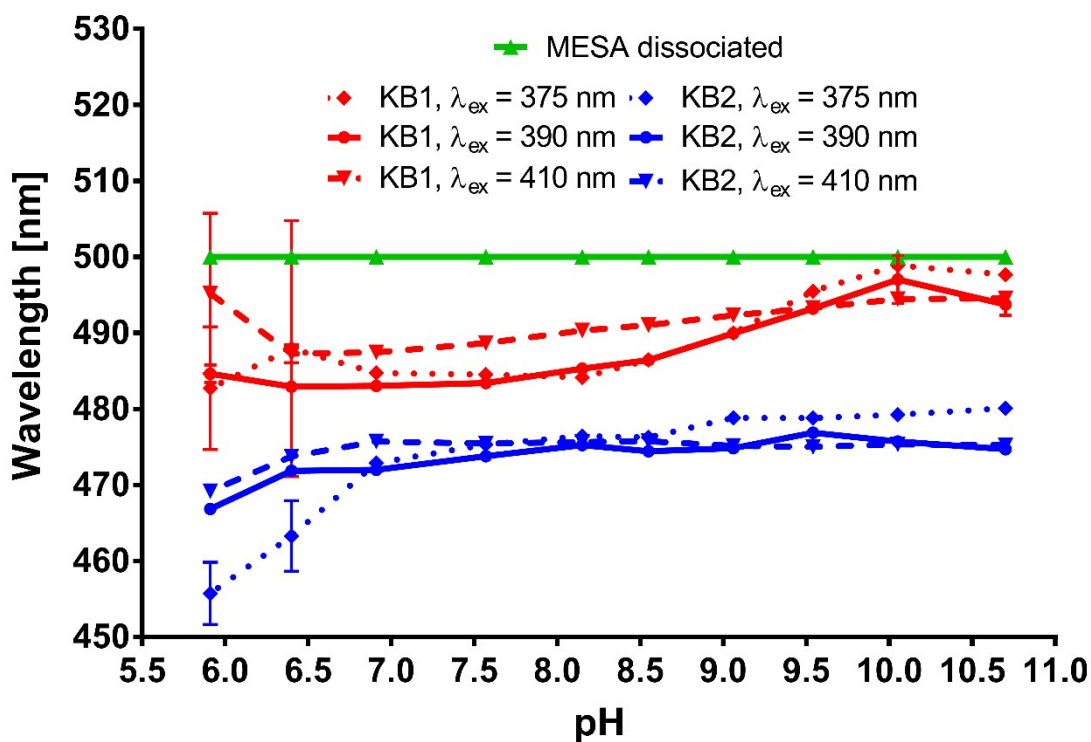

Figure A.10. Fluorescence maxima of complexes from decomposed fluorescence spectra of MESA with BSA versus pH.

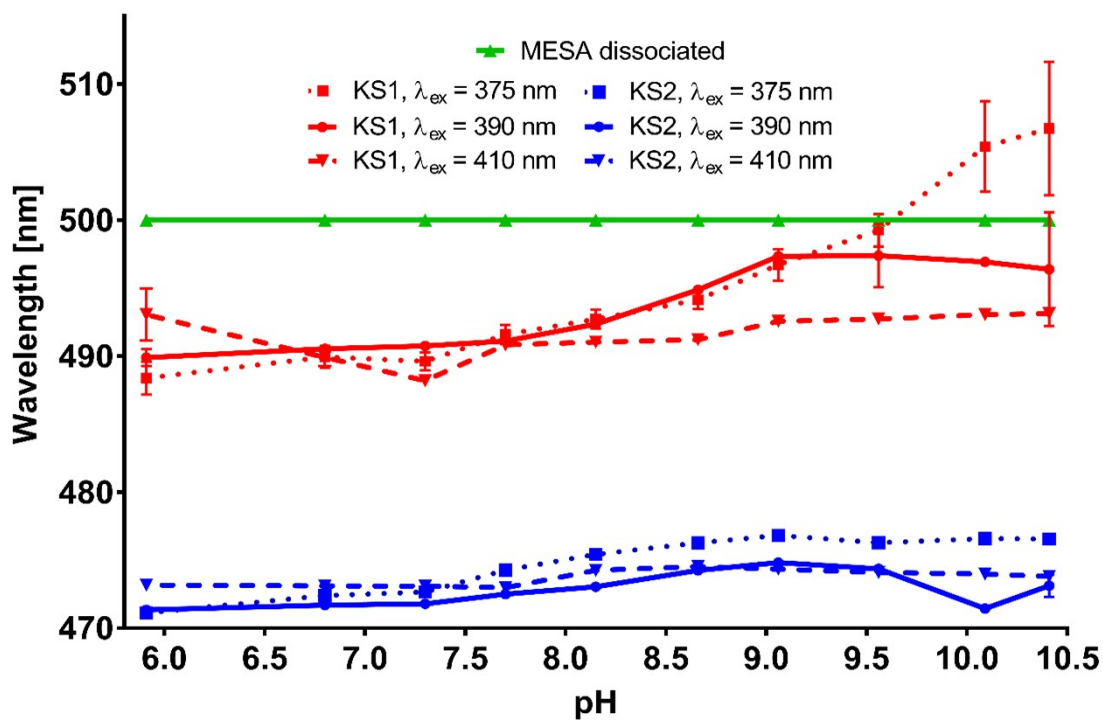

Figure A.11. Fluorescence maxima of complexes from decomposed fluorescence spectra of MESA with SSA versus pH.

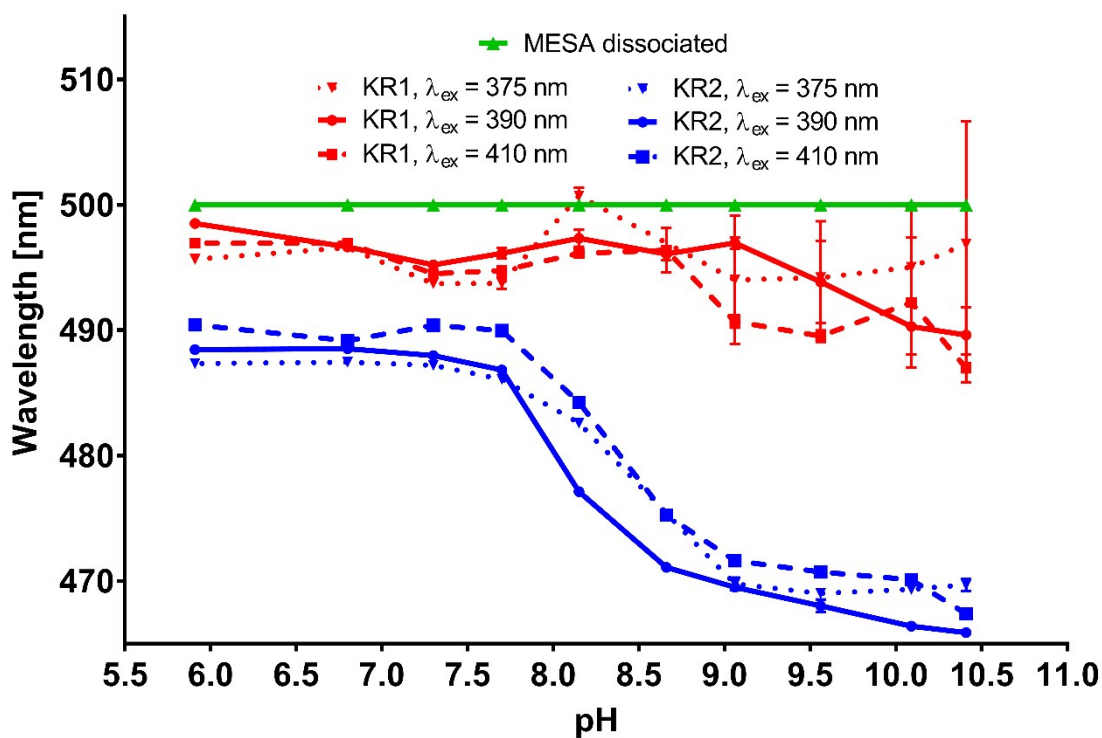

**Figure A.12.** Fluorescence maxima of complexes from decomposed fluorescence spectra of MESA with RSA versus pH.

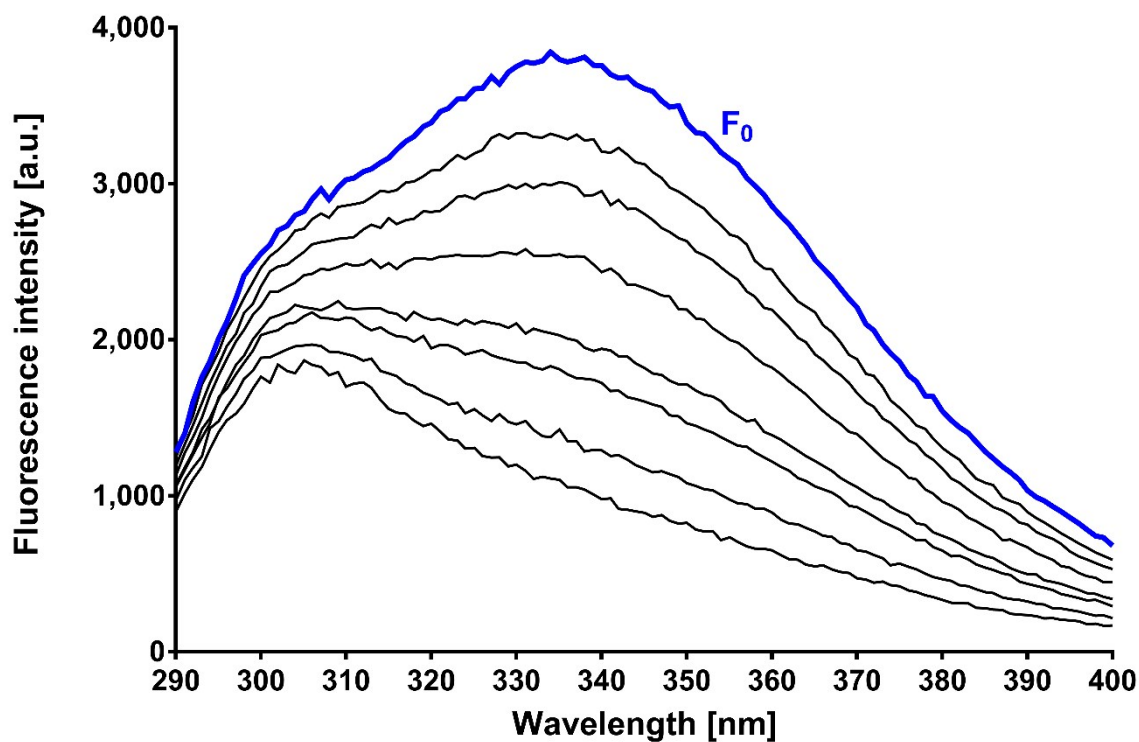

**Figure A.13.** Corrected fluorescence spectra of HSA with and without (blue) MESA. Concentration of HSA 5  $\mu\text{M}$ , MESA concentration: 2.5 - 50.0  $\mu\text{M}$ ,  $\lambda_{\text{ex}} = 280 \text{ nm}$ , 1 cm quartz cell, right angle geometry.
